# Supplementary material
Source: HighWire-hosted journal article supplement (https://srh.bmj.com/content/49/3/183)

Supplementary Figure 1. Flowchart of US survey respondents recruited via social media for a survey exploring interest in clinician-administered advance provision of abortion pills

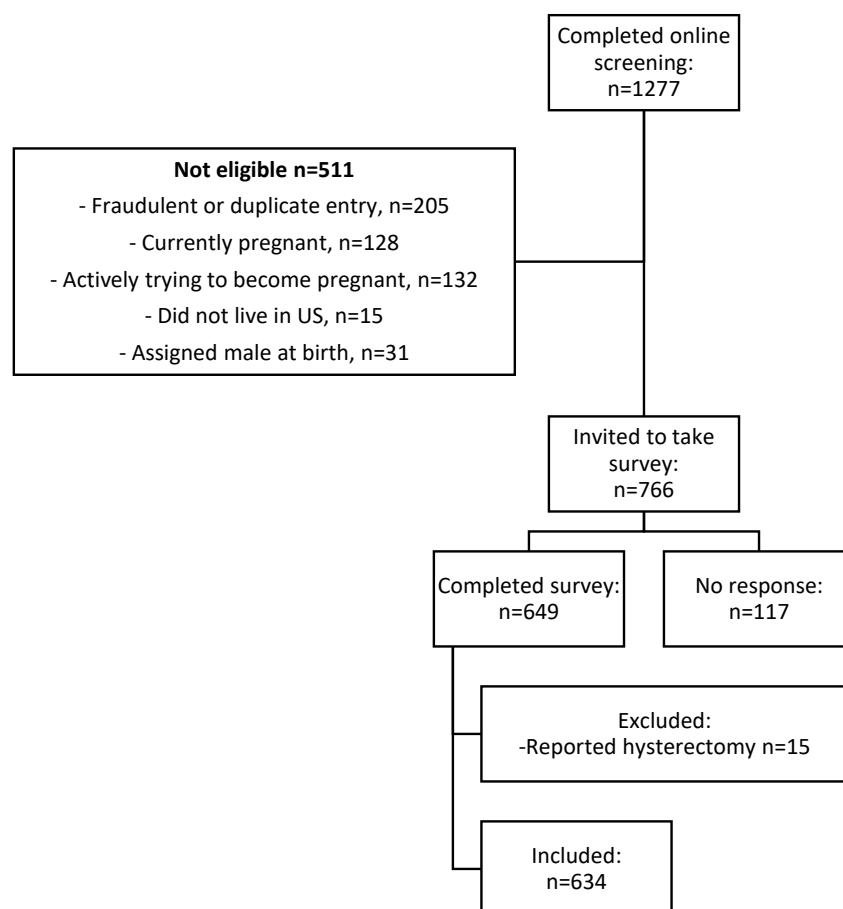

Supplement: inline-supplementary-material-1 [file inline-supplementary-material-1.pdf]
